# Supplementary material
Source: PubMed Central journal article supplement (PMC3523179)
Supplement: NIHMS386584-supplement-Suppl_pdf.pdf [file NIHMS386584-supplement-Suppl_pdf.pdf]

## **Supplemental Figure Legend**

### **Table S1. Summary of 454 deep sequencing data.**

Numbers of total and unique sequences from LNCaP and C4-2 are shown. The unique sequences are classified according to cloning frequency. miRNA sequences are extracted from the total sequences, yielding number of total and unique miRNA sequences.

### **Table S2. Sequencing frequency and LNA -microarray data of all miRNAs.**

Cloning frequencies (raw value) for each miRNA are indicated. Cloning frequency of a miRNA was divided by the total number of sequence of the corresponding sample (192,025 for LNCaP and 191,970 for C4-2) and then the normalized values were used to calculate ratio of C4-2/LNCaP. Each value in microarray data is ratio of median values from C4-2/LNCaP. "NA" indicates insignificant or poor detection of a miRNA in microarray, probably due to low expression of the miRNA. miRNAs that are cloned in our experiment but not present in the microarray are indicated as "NP". An asterisk (\*) was given to miRNAs of interesting expression profile which include; 1) miRNAs with a two-fold or higher change in LNA-microarray, or 2) miRNAs with a change of more than 33% in cloning ratio among the abundantly (>30 in either one sample) cloned ones. A fraction of these miRNAs were measured by qPCR and the results were summarized in Table 1.

### **Table S3. Reduction of miR-99 family and miR-125b in prostate tumors reported by Mattie et al.**

The fold changes of miR-99 family and miR-125b in normal adjacent to tumor samples compared to an advanced needle core biopsy of an advanced prostatic tumor (Gleason score 8) and a fine needle aspirate of a prostatic lymph node metastasis (FNA) are shown. The data was extracted from Mattie et al, 2006.

**Table S4. Primers used in 3'-UTR cloning for luciferase assay.**

The primers used to clone the 3'-UTR of SMARCD1, SMARCA5, mTOR and PPFIA3 are shown. The primers to generate mutations in the miR-99 family binding site in the 3'-UTR of SMARCD1, SMARCA5 and mTOR are also shown here.

**Figure S1. Pipeline of analysis of 454 deep sequencing data.**

A schematic of the 454 sequencing data analyses is depicted. See the text for details.

**Figure S2. Repression of miR-99 family on androgen-independent growth requires the presence of AR.**

**A-B.** Upon transfection of indicated miRNAs or si-GL2, cells (**A.** PC3 cells. **B.** Du145 cells) were cultured in whole serum, charcoal-stripped serum with or without 1nM R1881. After 72 hrs, BrdU incorporation was measured and normalized to cell density from MTT assay (y-axis). The mean and standard deviation from triplicate samples after normalizing to si-GL2 are shown.

**Figure S3. Validating polyribosome fractionation assay.**

**A.** Sequences of miR-99a, -99b and -100 are shown here. The seed sequence is underlined. The nucleotide differences are highlighted in grey. **B.** An example of a polyribosome fractionation trace is shown. Monoribosome and polyribosome fractionations are indicated. Tubes 5-7 were used as monoribosome fraction and tubes 16-18 were used as polyribosome fraction to extract RNAs. **C.** The fold enrichment of three mRNAs in monoribosome fractionation after miR-206 transfection is shown. The value of si-GL2 is set to 1. \*\* indicates p-value of difference from si-GL2<0.01.

**Figure S4. The recognition site of miR-99 family in the 3'-UTR of candidate genes.**

**A.** The miR-99a binding sites in the 3'-UTR of SMARCD1, SMARCA5, mTOR and PPFIA3 are shown. The seed sequence and matching sequence in targets are highlighted in grey. The

nucleotide matches between miR-99a and the 3'-UTR sequence is linked by '|'. **B.** The nucleotide sequences in the 3'-UTR MUT constructs are shown.

**Figure S5. Western blots of targets after siRNA knock-down or overexpression.**

**A.** Western blots of AR after transfection of indicated siRNA or miRNAs in C4-2 cells.  $\beta$ -actin was used as a loading control. **B.** Western blots of SMARCD1 after siRNA knock-down or overexpression of miRNA-resistant form of protein.  $\beta$ -actin was used as a loading control. **C.** Western blots of SMARCA5 after siRNA knock-down or overexpression of miRNA-resistant form of protein.  $\beta$ -actin was used as a loading control. **D.** Western blots of mTOR after siRNA knock-down or overexpression of miRNA-resistant form of protein.  $\beta$ -actin was used as a loading control.

**Figure S6. PSA mRNA after overexpression of miRNA-resistant target proteins.**

**A.** RT-qPCR was used to determine the mRNA of PSA after treating LNCaP with androgen analog R1881 at indicated concentrations. The miRNA level at no R1881 is set as 1. **B.** RT-qPCR was used to determine the mRNA of SARG after transfecting indicated miRNA or siRNA in C4-2 cells. Results were normalized to  $\beta$ -actin. **C.** RT-qPCR was used to determine the mRNA level of PSA after transfection of indicated miRNAs or siRNA in C4-2 cells stably overexpressing miRNA-resistant SMARCD1 or SMARCA5. PSA mRNA was normalized to  $\beta$ -actin. **D.** RT-qPCR was used to determine the mRNA level of PSA after transfection of indicated miRNAs or siRNA in C4-2 cells stably overexpressing miRNA-resistant mTOR. PSA mRNA was normalized to  $\beta$ -actin.

**Figure S7. Full length western blots.**

The full length western blots for SMARCD1, SMARCA5, mTOR and PPFIA3 used in Fig 2A are shown. The correct band is marked by asterisk (\*).

Sun et al\_Figure S1

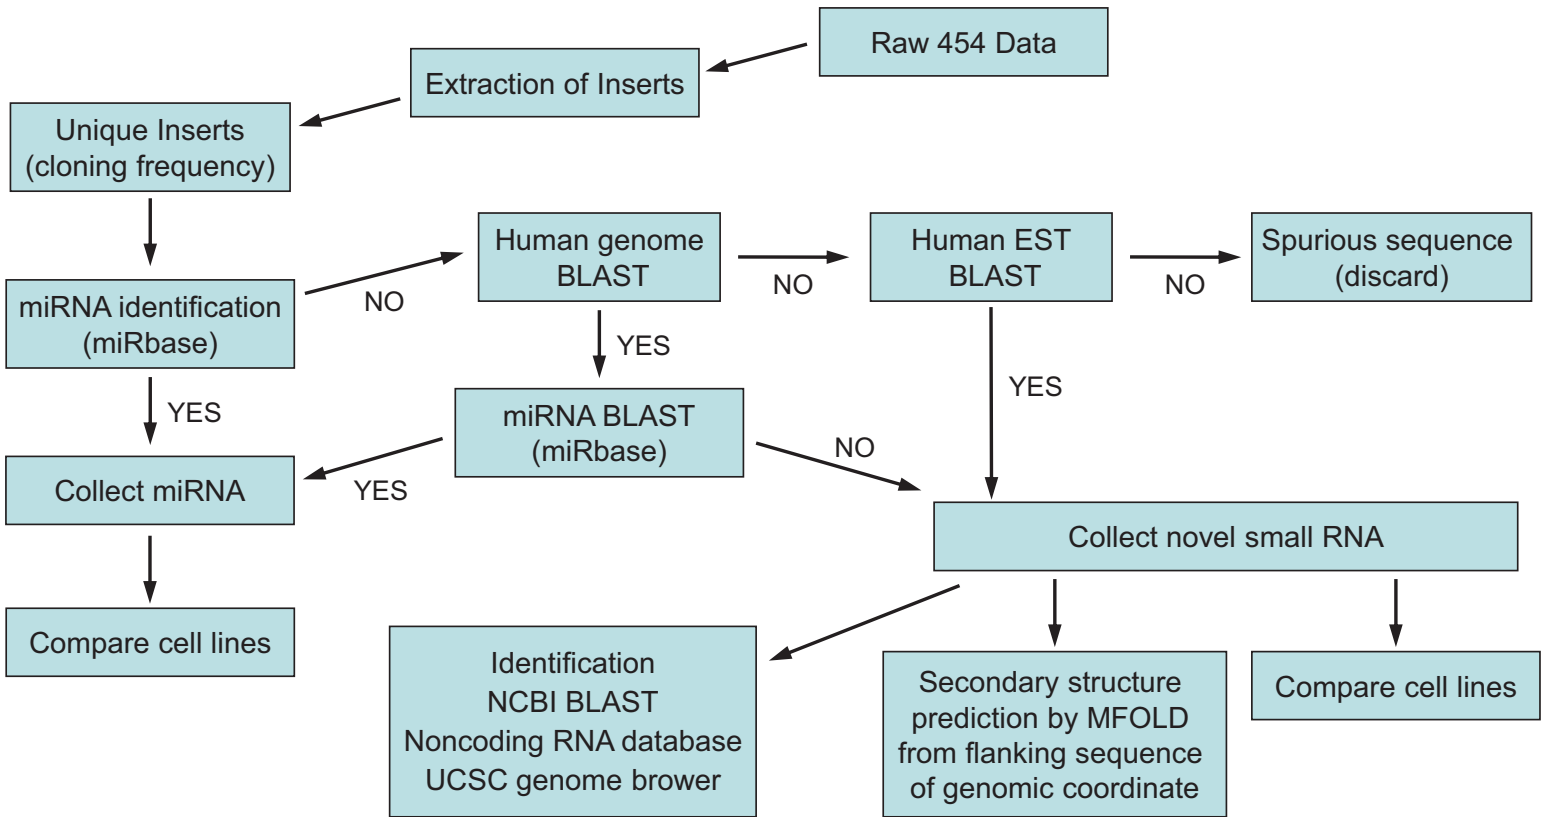

Sun et al\_Figure S2

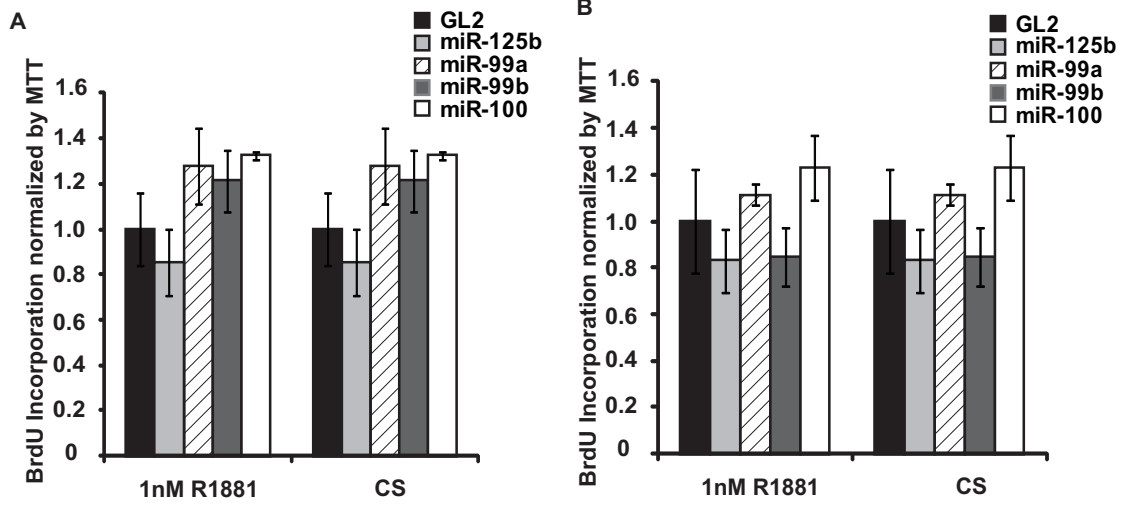

# Sun et al\_Figure S3

## A miR-99 family

>hsa-miR-100     AACCCGUAGAUCCGAACUUGUG  
>hsa-miR-99a    AACCCGUAGAUCCGAACUUGUG  
>hsa-miR-99b    CACCCGUAGAAACCGACCUUGCG

## B

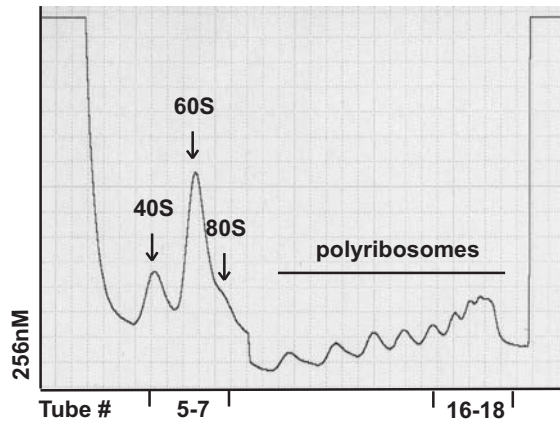

## C

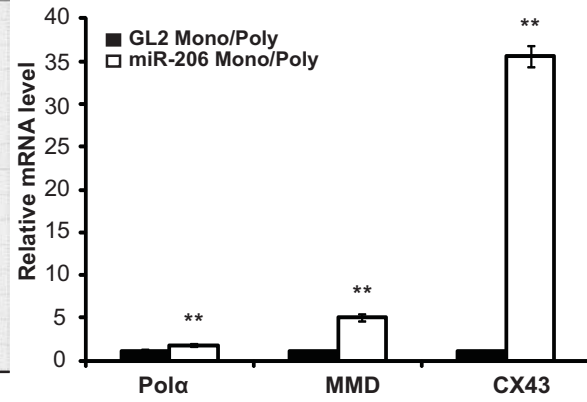

## Sun et al\_Figure S4

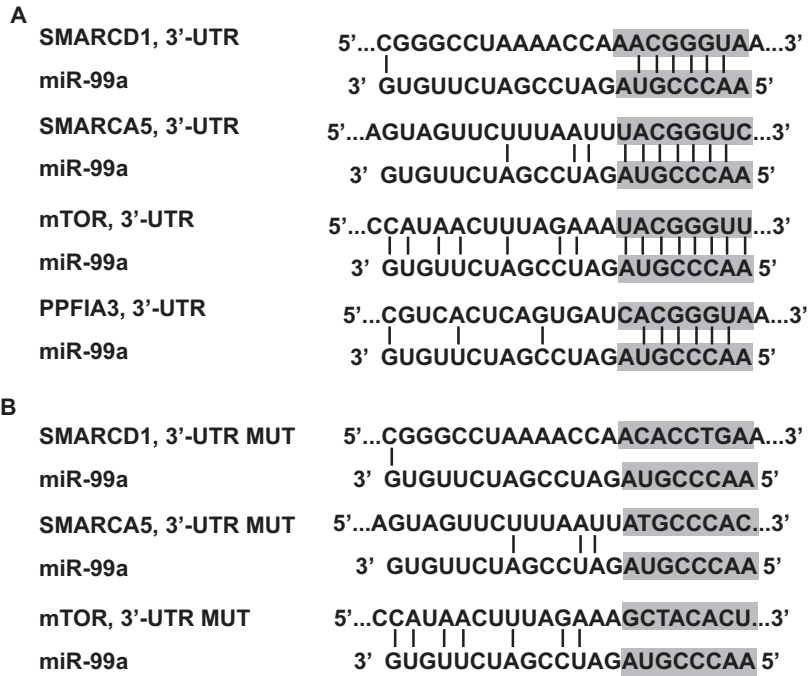

Sun et al\_Figure S5

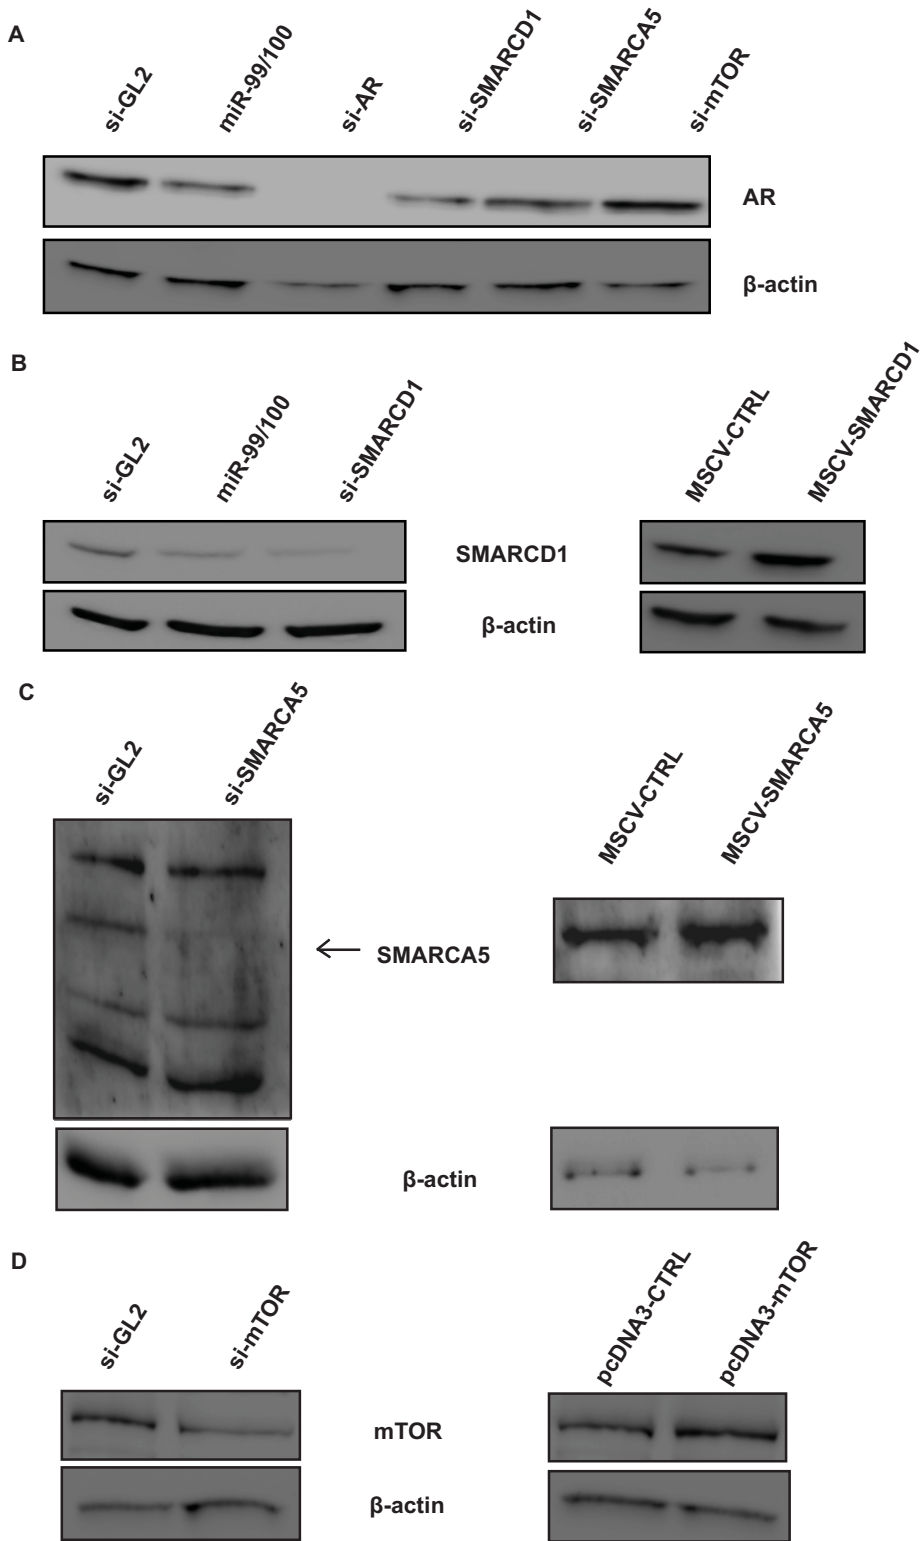



Sun et al\_Figure S6

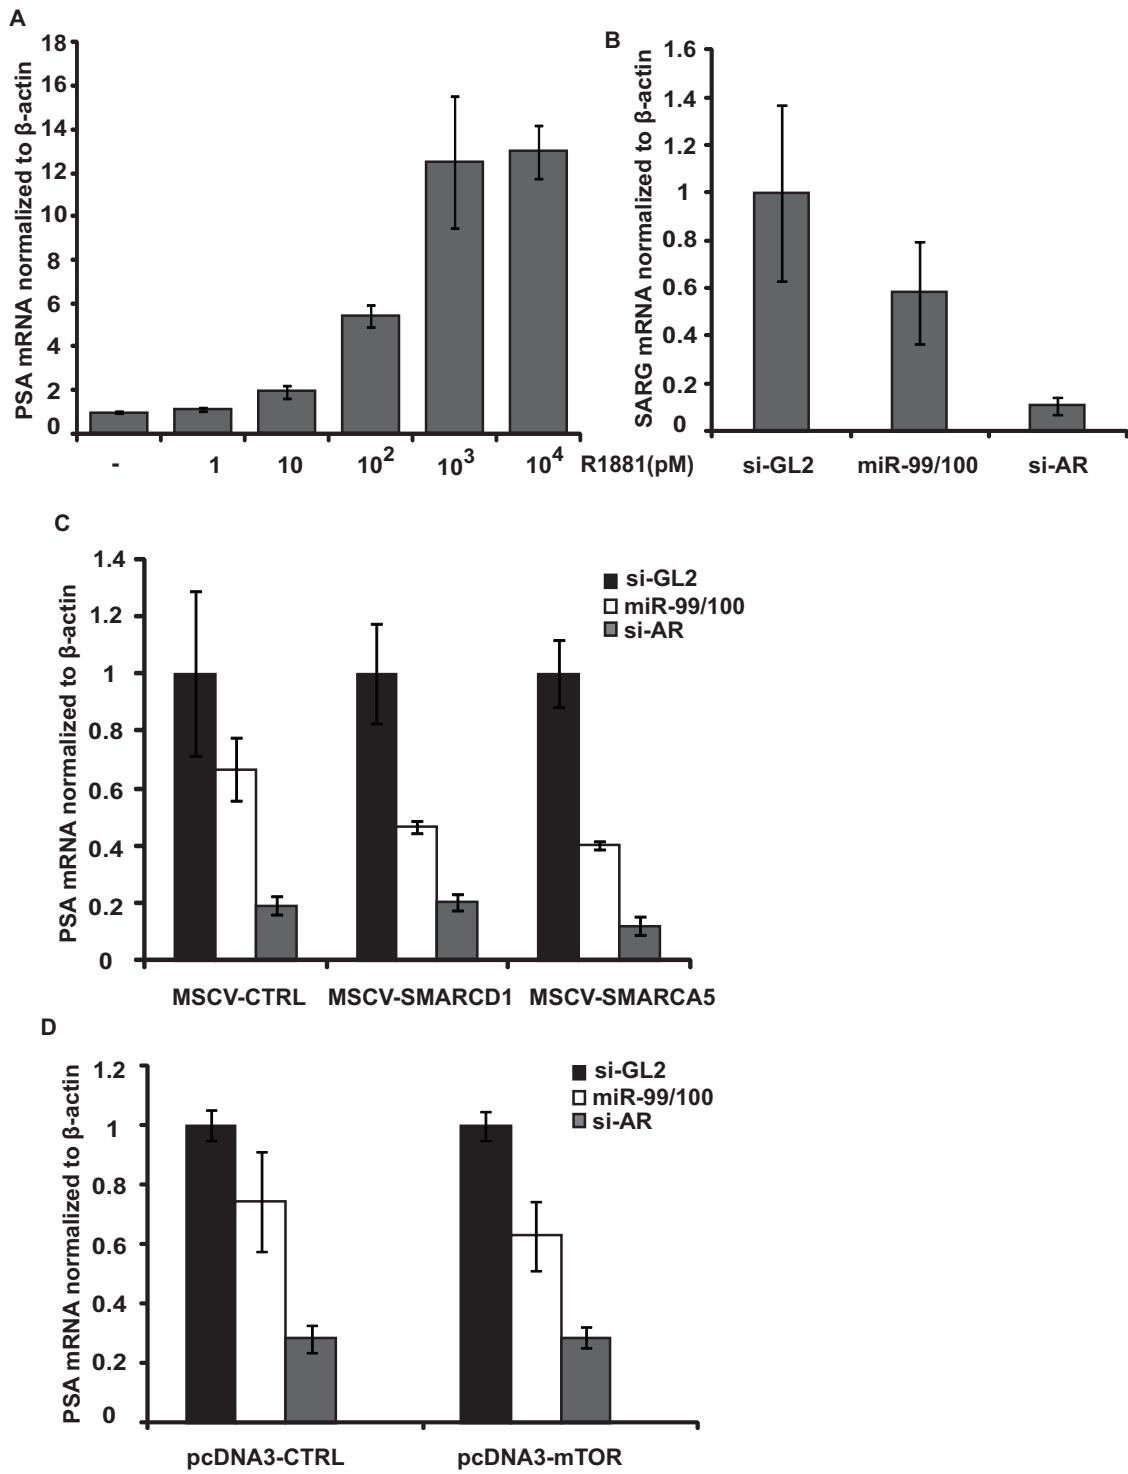

Sun et al\_Figure S7

si-GL2 miR-99a miR-99b miR-100

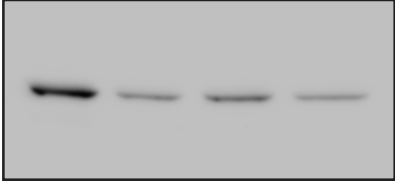

\* SMARCD1

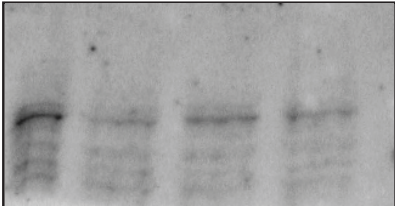

\* PPFIA3

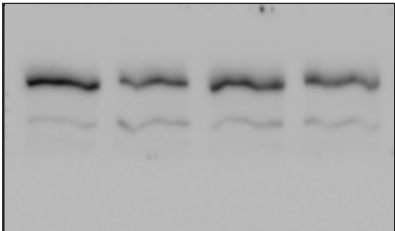

\* mTOR

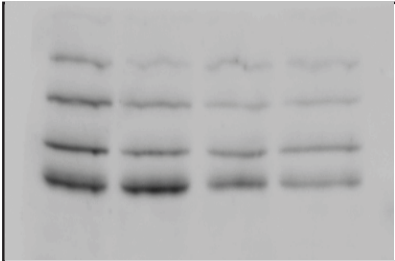

\* SMARCA5

Sun et al\_Table S1

|                                                |                           | <b>C4-2</b>    | <b>LNCaP</b>   |
|------------------------------------------------|---------------------------|----------------|----------------|
| <b>total number of sequence</b>                |                           | <b>191,970</b> | <b>192,025</b> |
| <b>unique sequences number</b>                 |                           | <b>15,776</b>  | <b>11,756</b>  |
|                                                | <b>ratio (%)</b>          | 8.22           | 6.12           |
| <b>cloning frequencies of unique sequences</b> |                           |                |                |
| <b>&lt;5</b>                                   | <b>number</b>             | <b>14,396</b>  | <b>10,563</b>  |
|                                                | <b>% of total unique</b>  | 91.25          | 89.85          |
| <b>5&lt; &lt;50</b>                            | <b>number</b>             | <b>1,126</b>   | <b>978</b>     |
|                                                | <b>% of total unique</b>  | 7.14           | 8.32           |
| <b>&gt;50</b>                                  | <b>number</b>             | <b>254</b>     | <b>215</b>     |
|                                                | <b>% of total unique</b>  | 1.61           | 1.83           |
| <b>microRNA</b>                                | <b>total number</b>       | <b>59,448</b>  | <b>71,451</b>  |
|                                                | <b>ratio to total (%)</b> | 30.97          | 37.21          |
|                                                | <b>unique microRNAs</b>   | <b>240</b>     | <b>221</b>     |

Sun et al\_ Table S2

| miRNA_ID        | Cloning Frequency |        |             |             | miRNAs of interesting ratio |
|-----------------|-------------------|--------|-------------|-------------|-----------------------------|
|                 | frequency         |        | ratio       |             |                             |
|                 | C4-2              | LNCaP  | C4-2 /LNCaP | C4-2 /LNCaP |                             |
| hsa-let-7a      | 5,584             | 4,733  | 1.18        | 0.97        |                             |
| hsa-let-7a*     | 4                 | 8      | 0.50        | 1.13        |                             |
| hsa-let-7b      | 19,212            | 12,697 | 1.51        | 1.02        |                             |
| hsa-let-7b*     | 7                 | 7      | 1.00        | NP          |                             |
| hsa-let-7c      | 4,238             | 12,518 | 0.34        | 1.04        | *                           |
| hsa-let-7c*     | 1                 | 1      | 1.00        | NP          |                             |
| hsa-let-7d      | 391               | 374    | 1.05        | 1.10        |                             |
| hsa-let-7d*     | 39                | 26     | 1.50        | 0.97        |                             |
| hsa-let-7e      | 125               | 110    | 1.14        | 0.90        |                             |
| hsa-let-7e*     | 0                 | 0      |             | 0.99        |                             |
| hsa-let-7f      | 854               | 983    | 0.87        | 1.13        |                             |
| hsa-let-7f-1*   | 1                 | 0      |             | NP          |                             |
| hsa-let-7f-2*   | 0                 | 0      |             | 0.93        |                             |
| hsa-let-7g      | 517               | 770    | 0.67        | 0.94        | *                           |
| hsa-let-7g*     | 0                 | 0      |             | 0.99        |                             |
| hsa-let-7i      | 695               | 433    | 1.61        | 1.42        | *                           |
| hsa-let-7i*     | 77                | 25     | 3.08        | 1.00        | *                           |
| hsa-miR-1       | 0                 | 0      |             | 0.95        |                             |
| hsa-miR-100     | 0                 | 0      |             | 0.38        | *                           |
| hsa-miR-100*    | 0                 | 0      |             | 1.00        |                             |
| hsa-miR-101     | 47                | 63     | 0.75        | 0.69        |                             |
| hsa-miR-101*    | 0                 | 0      |             | 0.95        |                             |
| hsa-miR-103     | 856               | 705    | 1.21        | 0.89        |                             |
| hsa-miR-105     | 1                 | 0      |             | 1.03        |                             |
| hsa-miR-106a    | 66                | 68     | 0.97        | 0.49        |                             |
| hsa-miR-106b    | 323               | 370    | 0.87        | 0.79        |                             |
| hsa-miR-106b*   | 51                | 49     | 1.04        | 0.78        |                             |
| hsa-miR-107     | 70                | 54     | 1.30        | 0.87        |                             |
| hsa-miR-10a     | 1                 | 1      | 1.00        | 0.88        |                             |
| hsa-miR-10a*    | 0                 | 0      |             | 1.05        |                             |
| hsa-miR-10b     | 0                 | 0      |             | 1.03        |                             |
| hsa-miR-122     | 2                 | 0      |             | 0.93        |                             |
| hsa-miR-122*    | 1                 | 0      |             | NP          |                             |
| hsa-miR-124     | 1                 | 0      |             | 1.00        |                             |
| hsa-miR-125a-3p | 10                | 5      | 2.00        | 0.86        |                             |
| hsa-miR-125a-5p | 165               | 189    | 0.87        | 0.92        |                             |
| hsa-miR-125b    | 2,801             | 9,048  | 0.31        | 0.34        | *                           |
| hsa-miR-125b-1* | 0                 | 0      |             | 0.88        |                             |
| hsa-miR-125b-2* | 12                | 26     | 0.46        | NP          |                             |
| hsa-miR-126     | 4                 | 4      | 1.00        | 0.68        |                             |
| hsa-miR-126*    | 0                 | 0      |             | 0.90        |                             |
| hsa-miR-127-3p  | 0                 | 0      |             | 0.92        |                             |
| hsa-miR-128     | 24                | 25     | 0.96        | 1.08        |                             |
| hsa-miR-129*    | 0                 | 0      |             | 0.96        |                             |
| hsa-miR-129-5p  | 0                 | 0      |             | 1.06        |                             |
| hsa-miR-130a    | 0                 | 0      |             | 1.21        |                             |
| hsa-miR-130b    | 156               | 42     | 3.72        | 1.18        | *                           |
| hsa-miR-130b*   | 2                 | 0      |             | 0.97        |                             |
| hsa-miR-132     | 24                | 20     | 1.20        | 0.96        |                             |
| hsa-miR-132*    | 3                 | 0      |             | 0.92        |                             |
| hsa-miR-133a    | 0                 | 0      |             | NA          |                             |
| hsa-miR-134     | 0                 | 0      |             | 1.00        |                             |
| hsa-miR-135a    | 1                 | 0      |             | 0.93        |                             |
| hsa-miR-135b    | 0                 | 0      |             | 0.94        |                             |
| hsa-miR-136     | 0                 | 0      |             | 0.86        |                             |
| hsa-miR-137     | 0                 | 0      |             | 0.97        |                             |
| hsa-miR-138     | 2                 | 3      | 0.67        | 0.88        |                             |
| hsa-miR-139-5p  | 1                 | 3      | 0.33        | 1.03        |                             |
| hsa-miR-140-3p  | 48                | 22     | 2.18        | 0.93        | *                           |
| hsa-miR-140-5p  | 27                | 17     | 1.59        | 0.99        |                             |
| hsa-miR-141     | 230               | 225    | 1.02        | 0.88        |                             |
| hsa-miR-141*    | 1                 | 4      | 0.25        | 0.84        |                             |
| hsa-miR-142-3p  | 0                 | 1      | 0.00        | 1.06        |                             |
| hsa-miR-142-5p  | 0                 | 0      |             | 1.00        |                             |
| hsa-miR-143     | 0                 | 0      |             | 1.00        |                             |
| hsa-miR-143*    | 0                 | 0      |             | NA          |                             |
| hsa-miR-144     | 0                 | 0      |             | 0.96        |                             |
| hsa-miR-145     | 0                 | 0      |             | 0.98        |                             |
| hsa-miR-145*    | 0                 | 0      |             | 1.00        |                             |
| hsa-miR-146a    | 0                 | 0      |             | 0.72        |                             |
| hsa-miR-146b-5p | 0                 | 0      |             | 0.93        |                             |
| hsa-miR-147b    | 2                 | 1      | 2.00        | 0.98        |                             |

|                 |       |       |      |      |   |
|-----------------|-------|-------|------|------|---|
| hsa-miR-148a    | 36    | 10    | 3.60 | 1.56 | * |
| hsa-miR-148a*   | 0     | 0     |      | 1.20 |   |
| hsa-miR-148b    | 66    | 58    | 1.14 | 1.08 |   |
| hsa-miR-149     | 1     | 5     | 0.20 | 0.96 |   |
| hsa-miR-149*    | 3     | 0     |      | NP   |   |
| hsa-miR-151-3p  | 10    | 5     | 2.00 | 0.84 |   |
| hsa-miR-151-5p  | 220   | 189   | 1.16 | 0.80 |   |
| hsa-miR-152     | 2     | 8     | 0.25 | 0.87 |   |
| hsa-miR-153     | 2     | 2     | 1.00 | 0.88 |   |
| hsa-miR-154     | 0     | 0     |      | 0.96 |   |
| hsa-miR-154*    | 0     | 0     |      | 0.98 |   |
| hsa-miR-155     | 0     | 0     |      | 0.90 |   |
| hsa-miR-15a     | 282   | 670   | 0.42 | 0.58 | * |
| hsa-miR-15a*    | 6     | 9     | 0.67 | 0.95 |   |
| hsa-miR-15b     | 786   | 936   | 0.84 | 1.07 |   |
| hsa-miR-15b*    | 8     | 8     | 1.00 | 0.93 |   |
| hsa-miR-16      | 546   | 901   | 0.61 | 0.86 | * |
| hsa-miR-16-1*   | 0     | 1     | 0.00 | 0.75 |   |
| hsa-miR-16-2*   | 7     | 10    | 0.70 | NP   |   |
| hsa-miR-17      | 2,021 | 3,324 | 0.61 | 0.52 | * |
| hsa-miR-17*     | 12    | 28    | 0.43 | 0.53 |   |
| hsa-miR-181a    | 0     | 1     | 0.00 | 0.96 |   |
| hsa-miR-181a*   | 0     | 0     |      | 0.94 |   |
| hsa-miR-181a-2* | 0     | 1     | 0.00 | 0.99 |   |
| hsa-miR-181b    | 1     | 1     | 1.00 | 0.87 |   |
| hsa-miR-181c    | 0     | 0     |      | 0.91 |   |
| hsa-miR-181d    | 0     | 0     |      | 0.98 |   |
| hsa-miR-182     | 27    | 28    | 0.96 | 0.82 |   |
| hsa-miR-182*    | 0     | 0     |      | 0.77 |   |
| hsa-miR-183     | 31    | 20    | 1.55 | 0.85 | * |
| hsa-miR-183*    | 0     | 1     | 0.00 | 0.95 |   |
| hsa-miR-184     | 0     | 0     |      | 1.03 |   |
| hsa-miR-185     | 101   | 48    | 2.10 | 1.18 | * |
| hsa-miR-185*    | 2     | 1     | 2.00 | 1.09 |   |
| hsa-miR-186     | 34    | 23    | 1.48 | 0.94 |   |
| hsa-miR-186*    | 3     | 1     | 3.00 | NP   |   |
| hsa-miR-187     | 0     | 0     |      | 0.97 |   |
| hsa-miR-188-3p  | 2     | 1     | 2.00 | 1.01 |   |
| hsa-miR-188-5p  | 15    | 3     | 5.00 | 0.91 |   |
| hsa-miR-18a     | 140   | 178   | 0.79 | 0.62 |   |
| hsa-miR-18a*    | 2     | 5     | 0.40 | 0.77 |   |
| hsa-miR-18b     | 0     | 0     |      | 0.64 |   |
| hsa-miR-18b*    | 0     | 0     |      | 1.01 |   |
| hsa-miR-190     | 1     | 2     | 0.50 | 1.07 |   |
| hsa-miR-190b    | 14    | 3     | 4.67 | 1.13 |   |
| hsa-miR-191     | 424   | 398   | 1.07 | 1.01 |   |
| hsa-miR-191*    | 2     | 2     | 1.00 | 0.91 |   |
| hsa-miR-192     | 10    | 6     | 1.67 | 0.87 |   |
| hsa-miR-192     | 10    | 6     | 1.67 | 0.90 |   |
| hsa-miR-192*    | 0     | 0     |      | 1.00 |   |
| hsa-miR-193a-3p | 184   | 86    | 2.14 | 0.91 | * |
| hsa-miR-193a-5p | 9     | 4     | 2.25 | 1.22 |   |
| hsa-miR-193b    | 70    | 16    | 4.38 | 1.11 | * |
| hsa-miR-193b*   | 3     | 1     | 3.00 | NP   |   |
| hsa-miR-194     | 2     | 8     | 0.25 | 0.87 |   |
| hsa-miR-194*    | 0     | 1     | 0.00 | NP   |   |
| hsa-miR-195     | 30    | 60    | 0.50 | 0.82 | * |
| hsa-miR-195*    | 5     | 10    | 0.50 | NP   |   |
| hsa-miR-196a    | 2     | 3     | 0.67 | 1.03 |   |
| hsa-miR-196a*   | 0     | 0     |      | NP   |   |
| hsa-miR-196b    | 330   | 62    | 5.32 | 1.39 | * |
| hsa-miR-197     | 12    | 13    | 0.92 | 1.31 |   |
| hsa-miR-198     | 0     | 0     |      | 1.03 |   |
| hsa-miR-199a-3p | 0     | 1     | 0.00 | 0.94 |   |
| hsa-miR-199a-5p | 0     | 0     |      | 0.92 |   |
| hsa-miR-19a     | 96    | 108   | 0.89 | 0.56 |   |
| hsa-miR-19a*    | 0     | 0     |      | 0.96 |   |
| hsa-miR-19b     | 105   | 247   | 0.43 | 0.48 | * |
| hsa-miR-19b-1*  | 3     | 0     |      | 0.86 |   |
| hsa-miR-200a    | 353   | 437   | 0.81 | 1.01 |   |
| hsa-miR-200a*   | 3     | 7     | 0.43 | 0.94 |   |
| hsa-miR-200b    | 871   | 817   | 1.07 | 1.09 |   |
| hsa-miR-200b*   | 17    | 6     | 2.83 | 0.93 |   |
| hsa-miR-200c    | 4,759 | 3,026 | 1.57 | 1.13 | * |
| hsa-miR-200c*   | 1     | 1     | 1.00 | 0.97 |   |
| hsa-miR-203     | 21    | 41    | 0.51 | 0.89 | * |
| hsa-miR-204     | 0     | 0     |      | 0.93 |   |
| hsa-miR-205     | 0     | 0     |      | 0.97 |   |
| hsa-miR-206     | 0     | 0     |      | 0.95 |   |
| hsa-miR-208     | 0     | 0     |      | 1.04 |   |

|                     |       |       |      |      |   |
|---------------------|-------|-------|------|------|---|
| hsa-miR-20a         | 183   | 472   | 0.39 | 0.50 | * |
| hsa-miR-20a*        | 1     | 1     | 1.00 | NP   |   |
| hsa-miR-20b         | 0     | 0     |      | 0.54 |   |
| hsa-miR-20b*        | 0     | 0     |      | 0.84 |   |
| hsa-miR-21          | 2,760 | 3,964 | 0.70 | 0.71 | * |
| hsa-miR-21*         | 21    | 28    | 0.75 | NP   |   |
| hsa-miR-210         | 79    | 74    | 1.07 | 0.85 |   |
| hsa-miR-211         | 0     | 0     |      | 0.91 |   |
| hsa-miR-212         | 0     | 0     |      | 0.75 |   |
| hsa-miR-214         | 0     | 0     |      | 1.10 |   |
| hsa-miR-214*        | 0     | 0     |      | 0.91 |   |
| hsa-miR-215         | 0     | 0     |      | 0.93 |   |
| hsa-miR-216a        | 0     | 0     |      | 0.92 |   |
| hsa-miR-216b        | 0     | 0     |      | 0.98 |   |
| hsa-miR-217         | 0     | 0     |      | 1.11 |   |
| hsa-miR-218         | 0     | 0     |      | 0.90 |   |
| hsa-miR-219-1-3p    | 1     | 0     |      | NP   |   |
| hsa-miR-219-5p      | 0     | 0     |      | 0.99 |   |
| hsa-miR-22          | 245   | 113   | 2.17 | 1.12 | * |
| hsa-miR-22*         | 1     | 1     | 1.00 | 1.00 |   |
| hsa-miR-220         | 0     | 0     |      | 0.98 |   |
| hsa-miR-221         | 780   | 419   | 1.86 | 1.03 | * |
| hsa-miR-222         | 1,142 | 522   | 2.19 | 1.01 | * |
| hsa-miR-222*        | 0     | 0     |      | 0.98 |   |
| hsa-miR-223         | 0     | 0     |      | 0.92 |   |
| hsa-miR-224         | 18    | 5     | 3.60 | NP   |   |
| hsa-miR-23a         | 65    | 37    | 1.76 | 0.74 | * |
| hsa-miR-23a*        | 1     | 0     |      | NP   |   |
| hsa-miR-23b         | 70    | 56    | 1.25 | 0.73 |   |
| hsa-miR-23b*        | 0     | 0     |      | NP   |   |
| hsa-miR-24          | 27    | 32    | 0.84 | 0.74 |   |
| hsa-miR-24-1*/24-2* | 0     | 0     |      | 0.95 |   |
| hsa-miR-25          | 254   | 297   | 0.86 | 0.88 |   |
| hsa-miR-25*         | 6     | 1     | 6.00 | NP   |   |
| hsa-miR-26a         | 41    | 51    | 0.80 | 0.92 |   |
| hsa-miR-26a-1*      | 0     | 0     |      | 1.03 |   |
| hsa-miR-26b         | 26    | 14    | 1.86 | NP   |   |
| hsa-miR-26b*        | 0     | 1     | 0.00 | NP   |   |
| hsa-miR-27a         | 21    | 14    | 1.50 | 0.83 |   |
| hsa-miR-27a*        | 2     | 2     | 1.00 | 0.94 |   |
| hsa-miR-27b         | 41    | 51    | 0.80 | 0.76 |   |
| hsa-miR-27b*        | 2     | 0     |      | NP   |   |
| hsa-miR-28-3p       | 89    | 46    | 1.94 | 0.87 | * |
| hsa-miR-28-5p       | 23    | 32    | 0.72 | 0.87 | * |
| hsa-miR-296-3p      | 1     | 0     |      | NP   |   |
| hsa-miR-296-5p      | 0     | 0     |      | 1.16 |   |
| hsa-miR-297         | 0     | 0     |      | 1.09 |   |
| hsa-miR-299-3p      | 0     | 0     |      | 0.95 |   |
| hsa-miR-299-5p      | 0     | 0     |      | 1.05 |   |
| hsa-miR-29a         | 76    | 33    | 2.30 | 1.35 | * |
| hsa-miR-29a*        | 1     | 0     |      | 1.00 |   |
| hsa-miR-29b         | 68    | 60    | 1.13 | 1.36 |   |
| hsa-miR-29b-1*      | 0     | 2     | 0.00 | 1.01 |   |
| hsa-miR-29b-2*      | 4     | 1     | 4.00 | NP   |   |
| hsa-miR-29c         | 90    | 99    | 0.91 | 0.95 |   |
| hsa-miR-29c*        | 9     | 9     | 1.00 | 0.92 |   |
| hsa-miR-301a        | 12    | 11    | 1.09 | 0.75 |   |
| hsa-miR-301b        | 5     | 2     | 2.50 | 1.13 |   |
| hsa-miR-302a        | 0     | 0     |      | 0.91 |   |
| hsa-miR-302b        | 0     | 0     |      | 1.07 |   |
| hsa-miR-302c        | 0     | 0     |      | NA   |   |
| hsa-miR-302c*       | 0     | 0     |      | 0.82 |   |
| hsa-miR-302d        | 0     | 0     |      | NA   |   |
| hsa-miR-30a         | 2     | 11    | 0.18 | 0.88 |   |
| hsa-miR-30a*        | 0     | 0     |      | 0.90 |   |
| hsa-miR-30b         | 200   | 184   | 1.09 | 0.87 |   |
| hsa-miR-30b*        | 0     | 0     |      | 1.33 |   |
| hsa-miR-30c         | 141   | 127   | 1.11 | 0.86 |   |
| hsa-miR-30c-1*      | 0     | 0     |      | NP   |   |
| hsa-miR-30c-2*      | 0     | 1     | 0.00 | NP   |   |
| hsa-miR-30d         | 25    | 15    | 1.67 | 0.94 |   |
| hsa-miR-30d*        | 0     | 1     | 0.00 | 0.94 |   |
| hsa-miR-30e         | 8     | 8     | 1.00 | 0.77 |   |
| hsa-miR-30e*        | 4     | 1     | 4.00 | 0.76 |   |
| hsa-miR-31          | 0     | 0     |      | 0.95 |   |
| hsa-miR-31*         | 0     | 0     |      | 0.94 |   |
| hsa-miR-32          | 8     | 6     | 1.33 | 0.68 |   |
| hsa-miR-32*         | 3     | 1     | 3.00 | 1.03 |   |
| hsa-miR-320         | 28    | 21    | 1.33 | 0.89 |   |
| hsa-miR-324-3p      | 99    | 84    | 1.18 | NP   |   |

|                |     |     |      |      |   |
|----------------|-----|-----|------|------|---|
| hsa-miR-324-5p | 113 | 71  | 1.59 | 0.78 | * |
| hsa-miR-325    | 0   | 0   |      | 1.00 |   |
| hsa-miR-326    | 24  | 10  | 2.40 | 1.01 |   |
| hsa-miR-328    | 0   | 2   | 0.00 | 0.96 |   |
| hsa-miR-329    | 0   | 0   |      | 1.00 |   |
| hsa-miR-330-3p | 9   | 5   | 1.80 | 1.02 |   |
| hsa-miR-330-5p | 6   | 1   | 6.00 | 0.92 |   |
| hsa-miR-331-3p | 155 | 92  | 1.69 | 0.89 | * |
| hsa-miR-331-5p | 2   | 0   |      | 0.96 |   |
| hsa-miR-335    | 8   | 1   | 8.00 | 1.81 |   |
| hsa-miR-335*   | 1   | 0   |      | 1.01 |   |
| hsa-miR-337-5p | 0   | 0   |      | NA   |   |
| hsa-miR-338-3p | 0   | 0   |      | 0.82 |   |
| hsa-miR-338-5p | 0   | 0   |      | 0.91 |   |
| hsa-miR-339-3p | 17  | 9   | 1.89 | 0.89 |   |
| hsa-miR-339-5p | 36  | 50  | 0.72 | 0.76 | * |
| hsa-miR-33a    | 4   | 2   | 2.00 | 0.84 |   |
| hsa-miR-33a*   | 4   | 4   | 1.00 | 0.97 |   |
| hsa-miR-33b    | 31  | 25  | 1.24 | 0.94 |   |
| hsa-miR-33b*   | 0   | 0   |      | 0.97 |   |
| hsa-miR-340    | 0   | 1   | 0.00 | 0.78 |   |
| hsa-miR-340*   | 2   | 1   | 2.00 | NP   |   |
| hsa-miR-342-3p | 65  | 47  | 1.38 | 0.84 |   |
| hsa-miR-342-5p | 0   | 1   | 0.00 | NP   |   |
| hsa-miR-345    | 14  | 14  | 1.00 | 0.84 |   |
| hsa-miR-346    | 0   | 0   |      | 1.01 |   |
| hsa-miR-34a    | 299 | 320 | 0.93 | 0.81 |   |
| hsa-miR-34a*   | 3   | 1   | 3.00 | 0.92 |   |
| hsa-miR-34b*   | 0   | 0   |      | 0.97 |   |
| hsa-miR-34c-5p | 0   | 0   |      | 0.93 |   |
| hsa-miR-361-3p | 8   | 9   | 0.89 | 0.92 |   |
| hsa-miR-361-5p | 0   | 0   |      | 0.76 |   |
| hsa-miR-362-3p | 1   | 2   | 0.50 | 0.99 |   |
| hsa-miR-362-5p | 1   | 0   |      | 1.07 |   |
| hsa-miR-363    | 0   | 0   |      | 0.98 |   |
| hsa-miR-363*   | 0   | 0   |      | 0.99 |   |
| hsa-miR-365    | 33  | 24  | 1.38 | 1.35 |   |
| hsa-miR-367    | 0   | 0   |      | 0.93 |   |
| hsa-miR-369-3p | 0   | 0   |      | 0.99 |   |
| hsa-miR-369-5p | 0   | 0   |      | 0.97 |   |
| hsa-miR-370    | 0   | 0   |      | 0.89 |   |
| hsa-miR-371-3p | 0   | 0   |      | 0.91 |   |
| hsa-miR-371-5p | 0   | 0   |      | 1.30 |   |
| hsa-miR-372    | 0   | 0   |      | 1.01 |   |
| hsa-miR-373    | 2   | 0   |      | 0.94 |   |
| hsa-miR-373*   | 0   | 0   |      | 1.18 |   |
| hsa-miR-374a   | 3   | 4   | 0.75 | 1.03 |   |
| hsa-miR-374a*  | 0   | 2   | 0.00 | 1.03 |   |
| hsa-miR-374b   | 6   | 3   | 2.00 | 1.11 |   |
| hsa-miR-374b*  | 1   | 0   |      | NP   |   |
| hsa-miR-375    | 2   | 0   |      | 1.14 |   |
| hsa-miR-376a   | 0   | 0   |      | 0.94 |   |
| hsa-miR-376b   | 0   | 0   |      | 0.95 |   |
| hsa-miR-376c   | 0   | 0   |      | 0.96 |   |
| hsa-miR-377    | 0   | 0   |      | 0.98 |   |
| hsa-miR-378    | 25  | 8   | 3.13 | 0.94 |   |
| hsa-miR-378    | 0   | 0   |      | 0.96 |   |
| hsa-miR-378*   | 8   | 4   | 2.00 | 0.95 |   |
| hsa-miR-379    | 0   | 0   |      | 1.02 |   |
| hsa-miR-380    | 0   | 0   |      | NA   |   |
| hsa-miR-380*   | 0   | 0   |      | 1.03 |   |
| hsa-miR-381    | 0   | 0   |      | 1.52 |   |
| hsa-miR-382    | 0   | 0   |      | 0.94 |   |
| hsa-miR-383    | 0   | 0   |      | 0.93 |   |
| hsa-miR-384    | 0   | 0   |      | NA   |   |
| hsa-miR-409-3p | 0   | 0   |      | 1.00 |   |
| hsa-miR-409-5p | 0   | 0   |      | 1.05 |   |
| hsa-miR-410    | 0   | 0   |      | 0.99 |   |
| hsa-miR-411    | 0   | 0   |      | 0.98 |   |
| hsa-miR-412    | 0   | 0   |      | 0.98 |   |
| hsa-miR-421    | 5   | 5   | 1.00 | 0.97 |   |
| hsa-miR-422a   | 0   | 0   |      | 1.00 |   |
| hsa-miR-423-3p | 44  | 42  | 1.05 | 0.93 |   |
| hsa-miR-423-5p | 106 | 74  | 1.43 | 0.87 |   |
| hsa-miR-424    | 24  | 14  | 1.71 | 1.02 |   |
| hsa-miR-424*   | 1   | 1   | 1.00 | NP   |   |
| hsa-miR-425    | 72  | 44  | 1.64 | 1.07 | * |
| hsa-miR-425*   | 11  | 7   | 1.57 | 0.94 |   |
| hsa-miR-429    | 8   | 12  | 0.67 | 0.88 |   |
| hsa-miR-431    | 0   | 0   |      | 0.96 |   |

|                        |     |     |      |      |
|------------------------|-----|-----|------|------|
| hsa-miR-432            | 0   | 0   |      | 0.98 |
| hsa-miR-432*           | 0   | 0   |      | 0.97 |
| hsa-miR-433            | 0   | 0   |      | 0.98 |
| hsa-miR-448            | 0   | 0   |      | NA   |
| hsa-miR-449a           | 0   | 0   |      | 0.93 |
| hsa-miR-449b           | 0   | 0   |      | 0.95 |
| hsa-miR-450a           | 1   | 0   |      | 0.90 |
| hsa-miR-450b-5p        | 0   | 0   |      | 0.90 |
| hsa-miR-451            | 0   | 0   |      | 0.96 |
| hsa-miR-452            | 0   | 0   |      | 1.14 |
| hsa-miR-453            | 0   | 0   |      | 0.86 |
| hsa-miR-453            | 0   | 0   |      | 1.02 |
| hsa-miR-454            | 5   | 6   | 0.83 | 0.97 |
| hsa-miR-454*           | 1   | 4   | 0.25 | 1.01 |
| hsa-miR-455-3p         | 0   | 0   |      | NA   |
| hsa-miR-455-5p         | 0   | 0   |      | 0.95 |
| hsa-miR-483-3p         | 0   | 0   |      | 1.13 |
| hsa-miR-483-5p         | 0   | 0   |      | 1.43 |
| hsa-miR-484            | 4   | 12  | 0.33 | 0.80 |
| hsa-miR-485-3p         | 0   | 0   |      | 1.01 |
| hsa-miR-485-5p         | 0   | 0   |      | 0.95 |
| hsa-miR-486-3p         | 0   | 0   |      | 0.98 |
| hsa-miR-486-5p         | 4   | 2   | 2.00 | 1.05 |
| hsa-miR-487a           | 0   | 0   |      | 1.01 |
| hsa-miR-487b           | 0   | 0   |      | 1.21 |
| hsa-miR-488*           | 0   | 0   |      | 0.96 |
| hsa-miR-489            | 0   | 0   |      | 0.94 |
| hsa-miR-490-3p         | 0   | 0   |      | 1.05 |
| hsa-miR-490-5p         | 0   | 0   |      | 1.01 |
| hsa-miR-491-3p         | 0   | 0   |      | 0.72 |
| hsa-miR-491-5p         | 2   | 1   | 2.00 | 0.93 |
| hsa-miR-492            | 0   | 0   |      | 1.87 |
| hsa-miR-493            | 0   | 0   |      | 0.95 |
| hsa-miR-493*           | 0   | 1   | 0.00 | 0.93 |
| hsa-miR-494            | 0   | 0   |      | 1.06 |
| hsa-miR-495            | 0   | 0   |      | NA   |
| hsa-miR-496            | 0   | 0   |      | 1.08 |
| hsa-miR-497            | 140 | 134 | 1.05 | 0.95 |
| hsa-miR-497*           | 0   | 0   |      | NP   |
| hsa-miR-498            | 0   | 0   |      | 1.23 |
| hsa-miR-499-3p         | 0   | 0   |      | 1.00 |
| hsa-miR-499-5p         | 0   | 0   |      | 0.95 |
| hsa-miR-500            | 0   | 0   |      | 0.94 |
| hsa-miR-500*           | 0   | 0   |      | 0.98 |
| hsa-miR-501-3p         | 0   | 1   | 0.00 | 1.06 |
| hsa-miR-501-5p         | 0   | 0   |      | 0.95 |
| hsa-miR-502-3p         | 1   | 0   |      | 1.00 |
| hsa-miR-502-5p         | 0   | 0   |      | 0.97 |
| hsa-miR-503            | 6   | 6   | 1.00 | 1.14 |
| hsa-miR-504            | 1   | 0   |      | 0.96 |
| hsa-miR-505            | 9   | 6   | 1.50 | 0.95 |
| hsa-miR-505*           | 4   | 3   | 1.33 | 0.97 |
| hsa-miR-506            | 0   | 0   |      | 0.98 |
| hsa-miR-507            | 0   | 0   |      | 0.90 |
| hsa-miR-508-3p         | 0   | 0   |      | 0.91 |
| hsa-miR-509-3p         | 0   | 0   |      | 0.89 |
| hsa-miR-510            | 0   | 0   |      | 1.01 |
| hsa-miR-511            | 0   | 0   |      | NA   |
| hsa-miR-512-3p         | 3   | 0   |      | 0.97 |
| hsa-miR-512-5p         | 0   | 0   |      | 1.19 |
| hsa-miR-514            | 0   | 0   |      | 0.92 |
| hsa-miR-515-3p         | 0   | 0   |      | NA   |
| hsa-miR-515-5p         | 0   | 0   |      | 1.02 |
| hsa-miR-516a-3p/516b*  | 0   | 0   |      | 0.93 |
| hsa-miR-516b           | 0   | 0   |      | 1.03 |
| hsa-miR-517*           | 0   | 0   |      | 0.97 |
| hsa-miR-517a           | 0   | 0   |      | 1.00 |
| hsa-miR-517c           | 0   | 0   |      | 0.95 |
| hsa-miR-518a-3p        | 0   | 0   |      | 0.96 |
| hsa-miR-518a-5p        | 2   | 0   |      | 1.10 |
| hsa-miR-518b           | 0   | 0   |      | 1.44 |
| hsa-miR-518c           | 0   | 0   |      | 0.95 |
| hsa-miR-518c*          | 0   | 0   |      | 1.02 |
| hsa-miR-518d-3p        | 0   | 0   |      | 1.01 |
| hsa-miR-518d-5p/518f*/ | 0   | 0   |      | 0.99 |
| hsa-miR-518e           | 0   | 0   |      | 0.93 |
| hsa-miR-518e*/519a*/51 | 0   | 0   |      | 1.09 |
| hsa-miR-518f*          | 0   | 0   |      | 1.05 |
| hsa-miR-519b-3p        | 2   | 0   |      | 1.01 |
| hsa-miR-519c-3p        | 1   | 0   |      | 0.94 |



|                      |    |    |      |      |
|----------------------|----|----|------|------|
| hsa-miR-519d         | 0  | 0  |      | 1.31 |
| hsa-miR-519e         | 0  | 0  |      | 0.94 |
| hsa-miR-519e*        | 1  | 0  |      | 1.05 |
| hsa-miR-520a-3p      | 2  | 0  |      | NA   |
| hsa-miR-520a-5p      | 0  | 0  |      | 0.93 |
| hsa-miR-520b/520c-3p | 0  | 0  |      | 1.05 |
| hsa-miR-520c-3p/520f | 0  | 0  |      | 1.02 |
| hsa-miR-520d-3p      | 0  | 0  |      | 0.92 |
| hsa-miR-520e         | 0  | 0  |      | 0.93 |
| hsa-miR-520g         | 0  | 0  |      | 1.07 |
| hsa-miR-520g/520h    | 0  | 0  |      | 0.98 |
| hsa-miR-521          | 0  | 0  |      | 0.98 |
| hsa-miR-523          | 0  | 0  |      | 0.93 |
| hsa-miR-524-3p       | 0  | 0  |      | 1.01 |
| hsa-miR-524-5p       | 0  | 0  |      | 0.97 |
| hsa-miR-525-3p       | 0  | 0  |      | 1.03 |
| hsa-miR-525-5p       | 0  | 0  |      | 1.06 |
| hsa-miR-526b         | 0  | 0  |      | 1.03 |
| hsa-miR-526b*        | 1  | 0  |      | 0.98 |
| hsa-miR-532-3p       | 5  | 11 | 0.45 | NP   |
| hsa-miR-532-5p       | 15 | 10 | 1.50 | 0.89 |
| hsa-miR-539          | 0  | 0  |      | 0.89 |
| hsa-miR-541*         | 0  | 0  |      | NA   |
| hsa-miR-542-3p       | 3  | 1  | 3.00 | 0.88 |
| hsa-miR-542-5p       | 0  | 2  | 0.00 | 0.92 |
| hsa-miR-543          | 0  | 0  |      | 1.07 |
| hsa-miR-544          | 0  | 0  |      | NA   |
| hsa-miR-545          | 0  | 0  |      | 0.91 |
| hsa-miR-548a-3p      | 0  | 0  |      | 0.92 |
| hsa-miR-548a-5p      | 0  | 0  |      | 1.02 |
| hsa-miR-548b-3p      | 1  | 2  | 0.50 | 0.82 |
| hsa-miR-548c-3p      | 0  | 0  |      | 1.03 |
| hsa-miR-548d-3p      | 0  | 0  |      | 1.02 |
| hsa-miR-549          | 0  | 0  |      | 0.97 |
| hsa-miR-550*         | 0  | 0  |      | 1.05 |
| hsa-miR-551a         | 1  | 0  |      | 0.97 |
| hsa-miR-551b         | 0  | 0  |      | 0.95 |
| hsa-miR-552          | 0  | 0  |      | 1.00 |
| hsa-miR-553          | 0  | 0  |      | 0.99 |
| hsa-miR-554          | 0  | 0  |      | 0.99 |
| hsa-miR-555          | 0  | 0  |      | NA   |
| hsa-miR-556-5p       | 0  | 0  |      | NA   |
| hsa-miR-557          | 0  | 0  |      | 1.97 |
| hsa-miR-558          | 0  | 0  |      | 0.96 |
| hsa-miR-559          | 0  | 0  |      | 1.10 |
| hsa-miR-560          | 0  | 0  |      | 0.95 |
| hsa-miR-561          | 0  | 0  |      | 1.03 |
| hsa-miR-562          | 0  | 0  |      | 0.92 |
| hsa-miR-563          | 0  | 0  |      | 0.96 |
| hsa-miR-564          | 0  | 0  |      | 0.97 |
| hsa-miR-565          | 0  | 0  |      | 0.91 |
| hsa-miR-566          | 0  | 0  |      | 0.98 |
| hsa-miR-567          | 0  | 0  |      | 0.95 |
| hsa-miR-568          | 0  | 0  |      | 1.01 |
| hsa-miR-569          | 0  | 0  |      | 0.95 |
| hsa-miR-570          | 0  | 0  |      | 0.91 |
| hsa-miR-571          | 0  | 0  |      | 0.92 |
| hsa-miR-572          | 0  | 0  |      | 1.03 |
| hsa-miR-573          | 0  | 0  |      | 0.92 |
| hsa-miR-574-3p       | 4  | 7  | 0.57 | 1.01 |
| hsa-miR-574-5p       | 18 | 10 | 1.80 | 1.03 |
| hsa-miR-575          | 0  | 0  |      | 0.95 |
| hsa-miR-576-3p       | 0  | 0  |      | 1.01 |
| hsa-miR-577          | 0  | 0  |      | NA   |
| hsa-miR-578          | 0  | 0  |      | 0.87 |
| hsa-miR-580          | 0  | 0  |      | 0.93 |
| hsa-miR-581          | 0  | 0  |      | 0.91 |
| hsa-miR-582-3p       | 0  | 0  |      | 1.05 |
| hsa-miR-582-5p       | 0  | 0  |      | 1.04 |
| hsa-miR-583          | 0  | 0  |      | 1.15 |
| hsa-miR-584          | 0  | 0  |      | 1.38 |
| hsa-miR-585          | 0  | 0  |      | 0.94 |
| hsa-miR-586          | 0  | 0  |      | 0.99 |
| hsa-miR-587          | 0  | 0  |      | 0.97 |
| hsa-miR-588          | 0  | 0  |      | 0.95 |
| hsa-miR-589          | 0  | 0  |      | NP   |
| hsa-miR-589*         | 0  | 0  |      | 1.01 |
| hsa-miR-590-3p       | 0  | 0  |      | 1.07 |
| hsa-miR-590-5p       | 8  | 5  | 1.60 | 1.09 |
| hsa-miR-591          | 0  | 0  |      | 0.87 |

|                |    |    |      |      |
|----------------|----|----|------|------|
| hsa-miR-592    | 0  | 0  |      | 0.89 |
| hsa-miR-593*   | 0  | 0  |      | 0.95 |
| hsa-miR-595    | 0  | 0  |      | 0.93 |
| hsa-miR-596    | 0  | 0  |      | 1.01 |
| hsa-miR-597    | 0  | 1  | 0.00 | 1.02 |
| hsa-miR-598    | 5  | 0  |      | 1.34 |
| hsa-miR-599    | 0  | 0  |      | NA   |
| hsa-miR-600    | 0  | 0  |      | 0.82 |
| hsa-miR-601    | 0  | 0  |      | 0.91 |
| hsa-miR-602    | 0  | 0  |      | 1.67 |
| hsa-miR-603    | 0  | 0  |      | 0.90 |
| hsa-miR-604    | 0  | 0  |      | 0.99 |
| hsa-miR-605    | 0  | 0  |      | 1.00 |
| hsa-miR-606    | 0  | 0  |      | NA   |
| hsa-miR-607    | 0  | 0  |      | 0.99 |
| hsa-miR-608    | 0  | 0  |      | 0.93 |
| hsa-miR-609    | 0  | 0  |      | 0.93 |
| hsa-miR-610    | 0  | 0  |      | 1.00 |
| hsa-miR-611    | 0  | 0  |      | 1.21 |
| hsa-miR-612    | 0  | 0  |      | 1.03 |
| hsa-miR-613    | 0  | 0  |      | 0.98 |
| hsa-miR-614    | 0  | 0  |      | 1.02 |
| hsa-miR-615-3p | 47 | 32 | 1.47 | 1.04 |
| hsa-miR-615-5p | 1  | 0  |      | NP   |
| hsa-miR-616*   | 0  | 0  |      | 0.86 |
| hsa-miR-617    | 0  | 0  |      | 0.99 |
| hsa-miR-618    | 1  | 0  |      | 1.07 |
| hsa-miR-619    | 0  | 0  |      | 0.97 |
| hsa-miR-620    | 0  | 0  |      | 0.97 |
| hsa-miR-621    | 0  | 0  |      | 0.99 |
| hsa-miR-622    | 0  | 0  |      | 0.90 |
| hsa-miR-623    | 0  | 0  |      | 1.33 |
| hsa-miR-624    | 0  | 0  |      | 1.01 |
| hsa-miR-624*   | 0  | 0  |      | 0.93 |
| hsa-miR-625    | 0  | 0  |      | 0.95 |
| hsa-miR-625*   | 0  | 0  |      | 1.06 |
| hsa-miR-626    | 0  | 0  |      | NA   |
| hsa-miR-627    | 0  | 0  |      | 1.03 |
| hsa-miR-628-3p | 4  | 1  | 4.00 | 0.99 |
| hsa-miR-628-5p | 0  | 0  |      | 0.97 |
| hsa-miR-629    | 15 | 3  | 5.00 | 1.08 |
| hsa-miR-629*   | 0  | 0  |      | 0.98 |
| hsa-miR-630    | 0  | 0  |      | 1.04 |
| hsa-miR-631    | 0  | 0  |      | 1.01 |
| hsa-miR-632    | 0  | 0  |      | 0.95 |
| hsa-miR-633    | 0  | 0  |      | 1.01 |
| hsa-miR-634    | 0  | 0  |      | 1.00 |
| hsa-miR-635    | 0  | 0  |      | 1.01 |
| hsa-miR-636    | 0  | 0  |      | 0.95 |
| hsa-miR-637    | 0  | 0  |      | 1.27 |
| hsa-miR-638    | 0  | 0  |      | 1.14 |
| hsa-miR-639    | 0  | 0  |      | NA   |
| hsa-miR-640    | 0  | 0  |      | 0.98 |
| hsa-miR-641    | 0  | 0  |      | 1.01 |
| hsa-miR-642    | 0  | 0  |      | 1.24 |
| hsa-miR-643    | 0  | 0  |      | 0.84 |
| hsa-miR-644    | 0  | 0  |      | 0.93 |
| hsa-miR-645    | 0  | 0  |      | 1.01 |
| hsa-miR-646    | 0  | 0  |      | 1.00 |
| hsa-miR-647    | 0  | 0  |      | 1.04 |
| hsa-miR-648    | 0  | 0  |      | 1.02 |
| hsa-miR-649    | 0  | 0  |      | 0.96 |
| hsa-miR-650    | 0  | 0  |      | 0.96 |
| hsa-miR-651    | 0  | 0  |      | 0.89 |
| hsa-miR-652    | 9  | 4  | 2.25 | 1.19 |
| hsa-miR-654-3p | 0  | 0  |      | 0.99 |
| hsa-miR-654-5p | 0  | 0  |      | 1.20 |
| hsa-miR-655    | 0  | 0  |      | 0.98 |
| hsa-miR-656    | 0  | 0  |      | 0.96 |
| hsa-miR-657    | 0  | 0  |      | 1.01 |
| hsa-miR-658    | 0  | 0  |      | 1.04 |
| hsa-miR-659    | 0  | 0  |      | 0.99 |
| hsa-miR-660    | 26 | 11 | 2.36 | 0.95 |
| hsa-miR-661    | 0  | 0  |      | 1.01 |
| hsa-miR-662    | 0  | 0  |      | 1.06 |
| hsa-miR-663    | 0  | 0  |      | 1.64 |
| hsa-miR-665    | 0  | 0  |      | 1.22 |
| hsa-miR-668    | 0  | 0  |      | 1.22 |
| hsa-miR-671-3p | 1  | 1  | 1.00 | NP   |
| hsa-miR-671-5p | 0  | 0  |      | 1.04 |

|                |       |       |      |      |   |
|----------------|-------|-------|------|------|---|
| hsa-miR-671-5p | 0     | 0     |      | 1.31 |   |
| hsa-miR-675    | 0     | 0     |      | 1.08 |   |
| hsa-miR-7      | 23    | 19    | 1.21 | 1.01 |   |
| hsa-miR-708    | 0     | 3     | 0.00 | NP   |   |
| hsa-miR-7-1*   | 59    | 22    | 2.68 | 1.06 | * |
| hsa-miR-744    | 56    | 61    | 0.92 | 0.67 |   |
| hsa-miR-744*   | 3     | 3     | 1.00 | NP   |   |
| hsa-miR-758    | 0     | 0     |      | 1.03 |   |
| hsa-miR-760    | 18    | 3     | 6.00 | 1.00 |   |
| hsa-miR-765    | 0     | 0     |      | 1.06 |   |
| hsa-miR-766    | 4     | 2     | 2.00 | 1.28 |   |
| hsa-miR-767-3p | 1     | 0     |      | 1.02 |   |
| hsa-miR-767-5p | 25    | 17    | 1.47 | 1.05 |   |
| hsa-miR-768-3p | 0     | 0     |      | 0.88 |   |
| hsa-miR-768-5p | 0     | 0     |      | 0.93 |   |
| hsa-miR-769-3p | 6     | 3     | 2.00 | 0.88 |   |
| hsa-miR-769-5p | 2     | 5     | 0.40 | 0.91 |   |
| hsa-miR-770-5p | 0     | 0     |      | 1.01 |   |
| hsa-miR-801    | 0     | 0     |      | 1.13 |   |
| hsa-miR-802    | 0     | 0     |      | NA   |   |
| hsa-miR-874    | 1     | 0     |      | NP   |   |
| hsa-miR-875-3p | 0     | 0     |      | 0.91 |   |
| hsa-miR-876-3p | 0     | 0     |      | 1.03 |   |
| hsa-miR-876-5p | 0     | 0     |      | 1.03 |   |
| hsa-miR-877    | 10    | 9     | 1.11 | NP   |   |
| hsa-miR-885-5p | 0     | 0     |      | 1.08 |   |
| hsa-miR-886-3p | 0     | 0     |      | 1.05 |   |
| hsa-miR-886-5p | 0     | 0     |      | 1.06 |   |
| hsa-miR-887    | 0     | 1     | 0.00 | 1.07 |   |
| hsa-miR-888    | 0     | 0     |      | NA   |   |
| hsa-miR-890    | 0     | 0     |      | 0.94 |   |
| hsa-miR-891a   | 0     | 0     |      | 1.15 |   |
| hsa-miR-891b   | 0     | 0     |      | NA   |   |
| hsa-miR-9      | 15    | 0     |      | 2.76 | * |
| hsa-miR-9*     | 1     | 0     |      | 2.05 | * |
| hsa-miR-92a    | 73    | 165   | 0.44 | 0.51 | * |
| hsa-miR-92a-1* | 2     | 3     | 0.67 | NP   |   |
| hsa-miR-92b    | 12    | 7     | 1.71 | 0.60 |   |
| hsa-miR-92b*   | 1     | 1     | 1.00 | NP   |   |
| hsa-miR-93     | 966   | 955   | 1.01 | 0.76 |   |
| hsa-miR-93*    | 17    | 8     | 2.13 | 0.85 |   |
| hsa-miR-934    | 0     | 0     |      | 1.02 |   |
| hsa-miR-939    | 0     | 0     |      | NP   |   |
| hsa-miR-940    | 3     | 0     |      | 1.76 |   |
| hsa-miR-941    | 13    | 9     | 1.44 | NP   |   |
| hsa-miR-95     | 0     | 0     |      | 0.97 |   |
| hsa-miR-96     | 2     | 6     | 0.33 | 0.89 |   |
| hsa-miR-96*    | 0     | 0     |      | 0.99 |   |
| hsa-miR-98     | 99    | 66    | 1.50 | 0.98 |   |
| hsa-miR-99a    | 1,300 | 6,237 | 0.21 | 0.39 | * |
| hsa-miR-99a*   | 14    | 24    | 0.58 | 0.43 |   |
| hsa-miR-99b    | 151   | 245   | 0.62 | 0.66 | * |
| hsa-miR-99b*   | 10    | 6     | 1.67 | 1.01 |   |

Sun et al\_Table S3

| miRNAs   | Normal/Gleason 8 |             | Normal/Metastasis |             |
|----------|------------------|-------------|-------------------|-------------|
|          | Fold change      | Log 2 ratio | Fold change       | Log 2 ratio |
| miR-99a  | 90.76057         | 6.503994    | 42.54776          | 5.411011    |
| miR-99b  | 29.02084         | 4.859017    | 10.34597          | 3.370997    |
| miR-100  | 22.5805          | 4.497005    | 25.66999          | 4.682011    |
| miR-125b | 62.98816         | 5.977009    | 37.87018          | 5.24299     |

Mattie et al, 2006

Sun et al\_ Table S4

| Name        | Forward                               | Reverse                               |
|-------------|---------------------------------------|---------------------------------------|
| SMARCD1     | CGGGGTACCCTGATTGACTGCACCAATTC         | CCGCTCGAGTGGCTAATGGTATTGAAGGAAGA      |
| SMARCA5     | CGGGGTACCCAGTAGTTCTTTAATTTACGGGTCT    | CCGCTCGAGGAAGCCTATTTTATTACTTCAAGTGT   |
| mTOR        | CGGGGTACCAGATGTGCCCATCACGTTTT         | CCGGAATTCTGGTGTCTAGACATGGCTACACTT     |
| PPFIA3      | CGGGGTACCGATCAGTTTCTGTTGGGAGACG       | CCGGAATTCGAAACAGTTCTCTTTACCCGTGA      |
| SMARCD1-MUT | CGGGCCTAAAACCAACACCTGAAAAAGCCCTGGGCC  | GGCCAGGGCTTTTTCAGGTGTTGGTTTTAGGCCCG   |
| SMARCA5-MUT | AGTAGTTCTTTAATTATGCCCACTTCATAAGATGTAC | TCATCAAGAAATTAATACGGGTGAAGTATTCTACATG |
| mTOR-MUT    | CCATAACTTTAGAAAGCTACACTTTGACTTAACTCAC | GTGAGTTAAGTCAAAGTGTAGCTTTCTAAAGTTATGG |
